# Supplementary material for: Beliefs and practices during pregnancy, post-partum and in the first days of an infant’s life in rural Cambodia
Source: PubMed Central journal article supplement (PMC5389162; doi:10.1186/s12884-017-1305-9), 2017-04-12
Supplement: 12884_2017_1305_MOESM1_ESM.pdf [file 12884_2017_1305_MOESM1_ESM.pdf]

# Health perception, beliefs and practices at the time of delivery and in the neonatal period in rural Cambodia

## Focus Group Discussion Topic Guide

Study code: HPB -|\_|\_|\_|

Facilitator Initials: |\_|\_|\_|

Note-taker Initials: |\_|\_|\_|

Date: |\_|\_|/|\_|\_|\_|/|\_|\_|

Audio file: FGD - |\_|\_|\_|\_|\_|\_|\_|- |\_|\_|\_|\_|

### Has Consent Been Signed?

- ⇒ Ask group to introduce themselves using first names
- ⇒ Today's topic for discussion (check meeting time table and use specific guide)
- ⇒ Aims of the discussion and expected duration (2 hour)
- ⇒ Make the group ground rules
- ⇒ Any questions
- ⇒ Check position of the tape recorder
- ⇒ Check for everyone's consent to participate and be recorded
- ⇒ Refreshments will be served after the discussion

### Domain

### Topic and Probes

### Delivery

1. Do you know of any problems that can happen to a woman during delivery?
2. Can any of these problems affect the baby?
3. Why do you think some women and babies get problems during delivery?
4. Some babies are born and do not breathe. Why do you think this happens?
5. What is the role of the father during delivery?
6. Do any other family members have important roles during delivery?
7. Why does a baby have an umbilical cord?
8. When a baby is born at home what is used to cut the umbilical cord?

#### Prompts:

Would you be worried if the mother in labour and childbirth had:

Fever

Waters broken but no labour pains

Bleeding from the vagina before delivery

Bleeding from the vagina after delivery

Had more than one day of labour pains

| Domain                     | Topic and Probes                                                                                                                                                                                                                                                                                                                                                                                                                                                                                                                                                                                                                                              |
|----------------------------|---------------------------------------------------------------------------------------------------------------------------------------------------------------------------------------------------------------------------------------------------------------------------------------------------------------------------------------------------------------------------------------------------------------------------------------------------------------------------------------------------------------------------------------------------------------------------------------------------------------------------------------------------------------|
| <b>Newborn</b>             | <ol style="list-style-type: none"> <li>1. Are there any special things that must be done after a baby is born and who does them?</li> <li>2. When does a child get their name?</li> </ol>                                                                                                                                                                                                                                                                                                                                                                                                                                                                     |
| <b>Neonatal illness</b>    | <ol style="list-style-type: none"> <li>1. How do you know a newborn baby is healthy?</li> <li>2. When should breast feeding start and why?</li> <li>3. Are there any signs that a baby is ill? (each answer will be examined by asking why each happens)</li> <li>4. Who can tell if a baby is sick?</li> </ol> <p>Prompts:</p> <p style="padding-left: 40px;">Would you be worried about a baby who had:</p> <p style="padding-left: 80px;">Fever</p> <p style="padding-left: 80px;">Breathing fast</p> <p style="padding-left: 80px;">Poor sucking</p> <p style="padding-left: 80px;">Yellow skin</p> <p style="padding-left: 80px;">Abnormal movements</p> |
| <b>Health care seeking</b> | <ol style="list-style-type: none"> <li>1. Whose responsibility is it to decide whether to take a sick baby for help?</li> <li>2. How is the decision made to take a baby for help?</li> <li>3. Who pays for treatment?</li> <li>4. When would a mother seek help for her baby?</li> <li>5. Where would they go first?</li> <li>6. How would they get there?</li> <li>7. Some babies die in the first one month of life can you explain why?</li> </ol>                                                                                                                                                                                                        |
| <b>Ethics</b>              | <ol style="list-style-type: none"> <li>1. Should all sick babies be referred to hospital?</li> <li>2. Who should decide whether a sick baby gets sent to hospital?</li> <li>3. What should happen if a parent refuses to take a baby to hospital?</li> <li>4. What do you understand by the term "human rights"?</li> <li>5. Does a baby have the same "human rights" as an older child/adult?</li> <li>6. When does life begin?</li> </ol>                                                                                                                                                                                                                   |
|                            |                                                                                                                                                                                                                                                                                                                                                                                                                                                                                                                                                                                                                                                               |
