# Supplementary material for: Beliefs and practices during pregnancy, post-partum and in the first days of an infant’s life in rural Cambodia
Source: PubMed Central journal article supplement (PMC5389162; doi:10.1186/s12884-017-1305-9), 2017-04-12
Supplement: 12884_2017_1305_MOESM2_ESM.pdf [file 12884_2017_1305_MOESM2_ESM.pdf]

# Health perception, beliefs and practices at the time of delivery and in the neonatal period in rural Cambodia

## Semi Structured Interview Topic Guide

Study code: HPB -|\_|\_|\_| Facilitator Initials: |\_|\_|\_| Note-taker Initials: |\_|\_|\_|

Date: |\_|\_|/|\_|\_|/|\_|\_| Audio file: SSI - |\_|\_|\_|\_|\_|\_|- |\_|\_|\_|

### Has Consent Been Signed?

#### Introduction

- ⇒ General purpose of the study
- ⇒ Aims of the interview and expected duration
- ⇒ Who is involved in the process (other participants)
- ⇒ Why the participant's cooperation is important
- ⇒ Check position of the tape recorder
- ⇒ What will happen with the collected information and how the participant/target group will benefit
- ⇒ Any questions?

#### Complete the CRF

| Domain   | Topic and Probes                                                                                                                                                                                                                                                                                                                                                                                                                                                                                                                                                                                                                                                                                                                                                                                                                                                                                                                                                           |
|----------|----------------------------------------------------------------------------------------------------------------------------------------------------------------------------------------------------------------------------------------------------------------------------------------------------------------------------------------------------------------------------------------------------------------------------------------------------------------------------------------------------------------------------------------------------------------------------------------------------------------------------------------------------------------------------------------------------------------------------------------------------------------------------------------------------------------------------------------------------------------------------------------------------------------------------------------------------------------------------|
| Delivery | <ol style="list-style-type: none"><li>1. Do you know of any problems that can happen to a woman during delivery?</li><li>2. Can any of these problems affect the baby?</li><li>3. Why do you think some women and babies get problems during delivery?</li><li>4. Some babies are born and do not breath. Why do you think this happens?</li><li>5. What is the role of the father during delivery?</li><li>6. Do any other family members have important roles during delivery?</li><li>7. Why does a baby have an umbilical cord?</li><li>8. When a baby is born at home what is used to cut the umbilical cord?</li></ol> <p><b>Prompts:</b></p> <p>Would you be worried if the mother in labour and childbirth had:</p> <ul style="list-style-type: none"><li>Fever</li><li>Waters broken but no labour pains</li><li>Bleeding from the vagina before delivery</li><li>Bleeding from the vagina after delivery</li><li>Had more than one day of labour pains</li></ul> |

| Domain                     | Topic and Probes                                                                                                                                                                                                                                                                                                                                                                                                                                                                                                                                                     |
|----------------------------|----------------------------------------------------------------------------------------------------------------------------------------------------------------------------------------------------------------------------------------------------------------------------------------------------------------------------------------------------------------------------------------------------------------------------------------------------------------------------------------------------------------------------------------------------------------------|
| <b>Newborn</b>             | <ol style="list-style-type: none"> <li>1. Are there any special things that must be done after a baby is born and who does them?</li> <li>2. When does a child get their name?</li> <li>3. Who chooses the child's name?</li> </ol>                                                                                                                                                                                                                                                                                                                                  |
| <b>Neonatal illness</b>    | <ol style="list-style-type: none"> <li>1. How do you know a newborn baby is healthy?</li> <li>2. When should breast feeding start and why?</li> <li>3. Are there any signs that a baby is ill? (each answer will be examined by asking why each happens)</li> <li>4. Who can tell if a baby is sick?</li> </ol> <p>Prompts:</p> <p style="padding-left: 40px;">Would you be worried about a baby who had:</p> <ul style="list-style-type: none"> <li>Fever</li> <li>Breathing fast</li> <li>Poor sucking</li> <li>Yellow skin</li> <li>Abnormal movements</li> </ul> |
| <b>Health care seeking</b> | <ol style="list-style-type: none"> <li>1. Whose responsibility is it to decide whether to take a sick baby for help?</li> <li>2. How is the decision made to take a baby for help?</li> <li>3. Who pays for treatment?</li> <li>4. When would a mother seek help for her baby?</li> <li>5. Where would they go first?</li> <li>6. How would they get there?</li> <li>7. Some babies die in the first one month of life can you explain why?</li> </ol>                                                                                                               |
| <b>Ethics</b>              | <ol style="list-style-type: none"> <li>1. Should all sick babies be referred to hospital?</li> <li>2. Who should decide whether a sick baby gets sent to hospital?</li> <li>3. What should happen if a parent refuses to take a baby to hospital?</li> <li>4. What do you understand by the term "human rights"?</li> <li>5. Does a baby have the same "human rights" as an older child/adult?</li> <li>6. When does life begin?</li> </ol>                                                                                                                          |

### Closing

- ⇒ Is there anything else you think is important in diagnosing malaria that we have not talked about?
- ⇒ Summarise
- ⇒ Thank the participant
- ⇒ Provide extra information and contacts to participants
